# Supplementary material for: Intracellular Ca2+ dynamics in the ALA neuron reflect sleep pressure and regulate sleep in Caenorhabditis elegans
Source: PubMed Central journal article supplement (PMC9189131; doi:10.1016/j.isci.2022.104452), 2022-05-23
Supplement: mmc1.pdf [file mmc1.pdf]

iScience, Volume 25

## Supplemental information

**Intracellular  $\text{Ca}^{2+}$  dynamics in the ALA neuron  
reflect sleep pressure and regulate  
sleep in *Caenorhabditis elegans***

**Shinichi Miyazaki, Taizo Kawano, Masashi Yanagisawa, and Yu Hayashi**

1 **SUPPLEMENTAL INFORMATION**

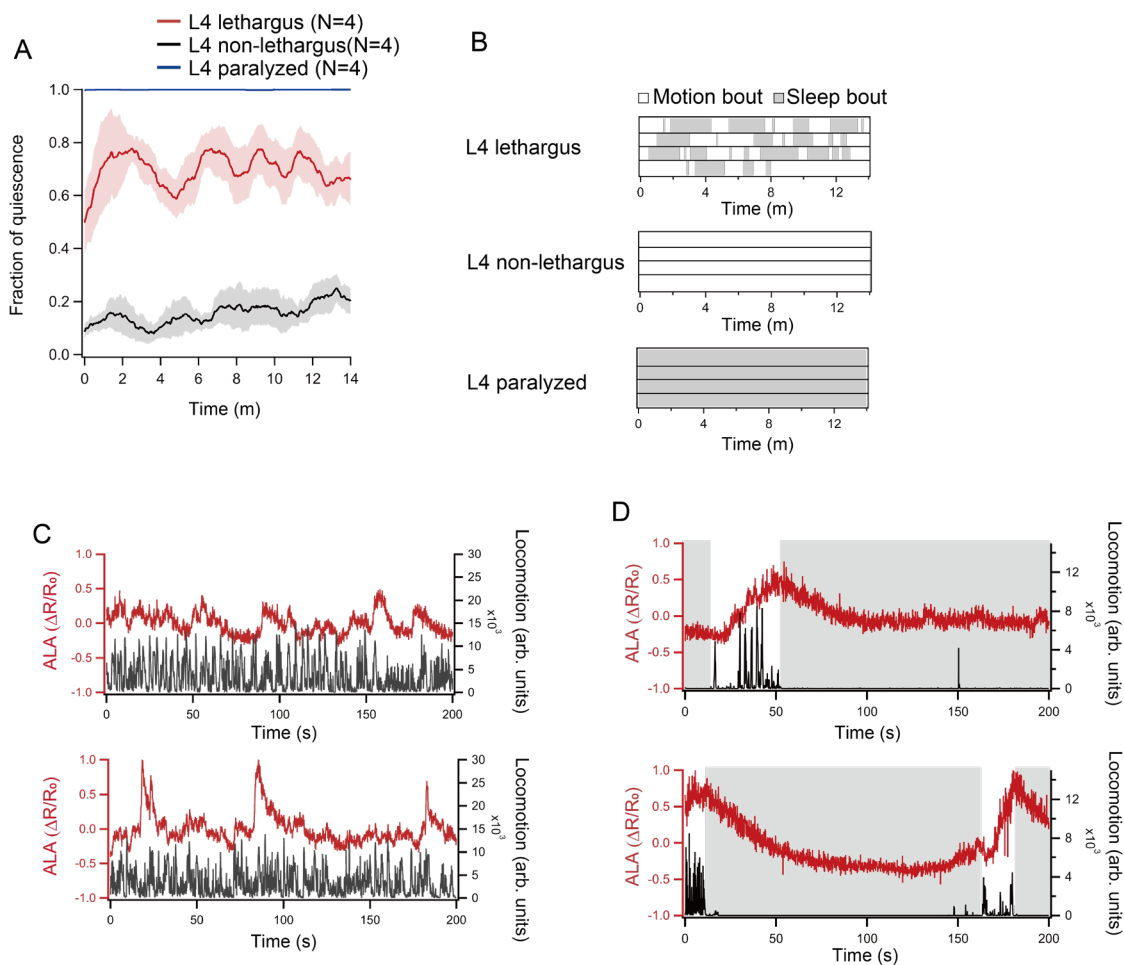

2

3 **Figure S1.** Detailed analyses of the behavior and ALA intracellular  $Ca^{2+}$  dynamics in AML70 *lite-1(ce314);*  
 4 *wtfls5[Prab-3::NLS::GcaMP6s; Prab-3::NLS::tagRFP]* (related to Figures 1 and 2)

5 (A, B) Comparison of the fraction of quiescence (A) and the representative patterns of sleep bouts and motion  
 6 bouts (B) among L4 lethargus, non-lethargus, and paralyzed larvae. Shaded areas in (A) indicate  $\pm$ SEM . N in  
 7 the figure represent numbers of animals.

8 (C) Representative patterns of ALA  $Ca^{2+}$  activity (red) and locomotor activity (black) in L4 non-lethargus  
 9 larvae.

10 (D) Additional representative patterns of ALA  $Ca^{2+}$  activity (red) and locomotor activity (black) in L4  
 11 lethargus larvae. Grey areas represent sleep bouts.

12

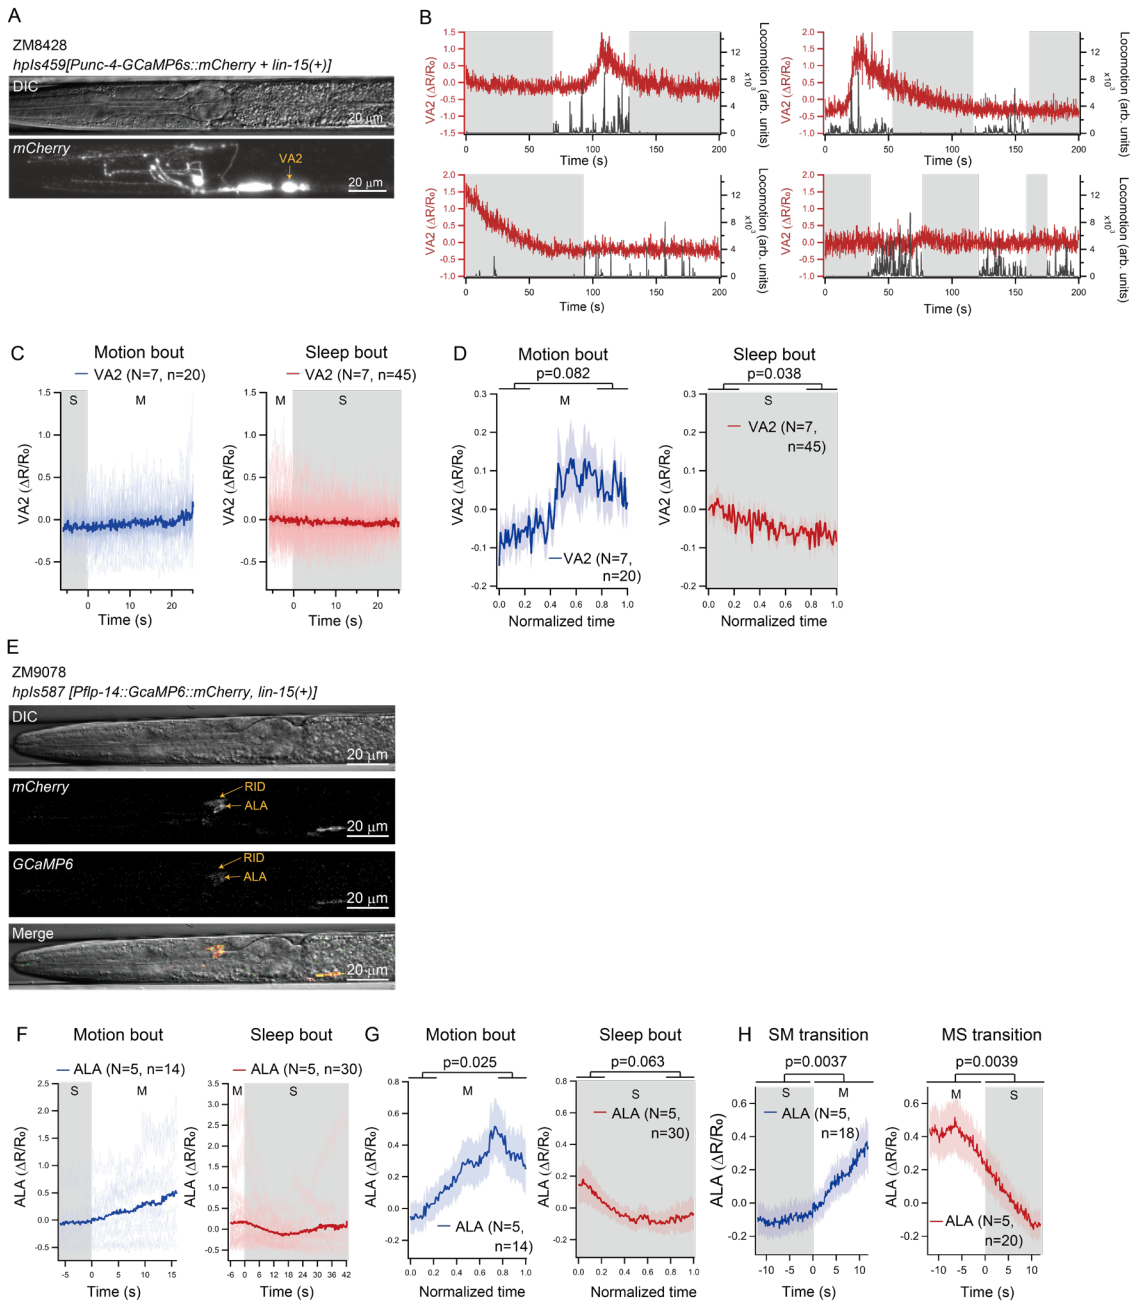

13

14 **Figure S2.** Ca<sup>2+</sup> imaging of the VA2 and ALA (related to Figures 2 and 3)

15 (A) Expression pattern of *mCherry* in ZM8428 *hpls459 [unc-4p::GCaMP3::mCherry + lin-15(+)]*.

16 (B) Representative patterns of VA2 intracellular Ca<sup>2+</sup> activity (red) and locomotor activity (black). Grey areas  
 17 represent sleep bouts.

18 (C) Individual (light blue or red) and averaged (dark blue or red) dynamics of VA2 intracellular Ca<sup>2+</sup> during

19 motion bouts (left) or sleep bouts (right). Grey areas represent sleep bouts.  
20 (D) Averaged dynamics of intracellular  $\text{Ca}^{2+}$  and locomotor activity along motion bouts (left) or sleep bouts  
21 (right). Here, the duration of each sleep or motion bout was normalized to 1. Shaded areas indicate  $\pm$ SEM. P-  
22 values in paired t-test (motion bout) and Wilcoxon signed-rank test (sleep bout) are indicated.  
23 (E) Expression patterns of *mCherry* (middle) and *GCaMP6* (lower) in ZM9078 *hpIs587 [Pflp-*  
24 *14::GcaMP6::mCherry, lin-15(+)]*.  
25 (F) Individual (light blue or red) and averaged (dark blue or red) dynamics of ALA intracellular  $\text{Ca}^{2+}$  during  
26 motion bouts (left) or sleep bouts (right) in ZM9078 *hpIs587 [Pflp-14::GcaMP6::mCherry, lin-15(+)]*. Grey  
27 areas represent sleep bouts.  
28 (G) Averaged dynamics of intracellular  $\text{Ca}^{2+}$  and locomotor activity along motion bouts (left) or sleep bouts  
29 (right). Here, the duration of each sleep or motion bout was normalized to 1. Shaded areas indicate  $\pm$ SEM. P-  
30 values in paired t-test (motion bout) and Wilcoxon signed-rank test (sleep bout) are indicated.  
31 (H) Averaged dynamics of  $\text{Ca}^{2+}$  activity around SM and MS transitions. Shaded areas indicate  $\pm$ SEM. P-  
32 values in paired t-test are indicated. Grey areas represent sleep bouts.  
33 N and n in the figure represent numbers of animals and bouts, respectively.  
34

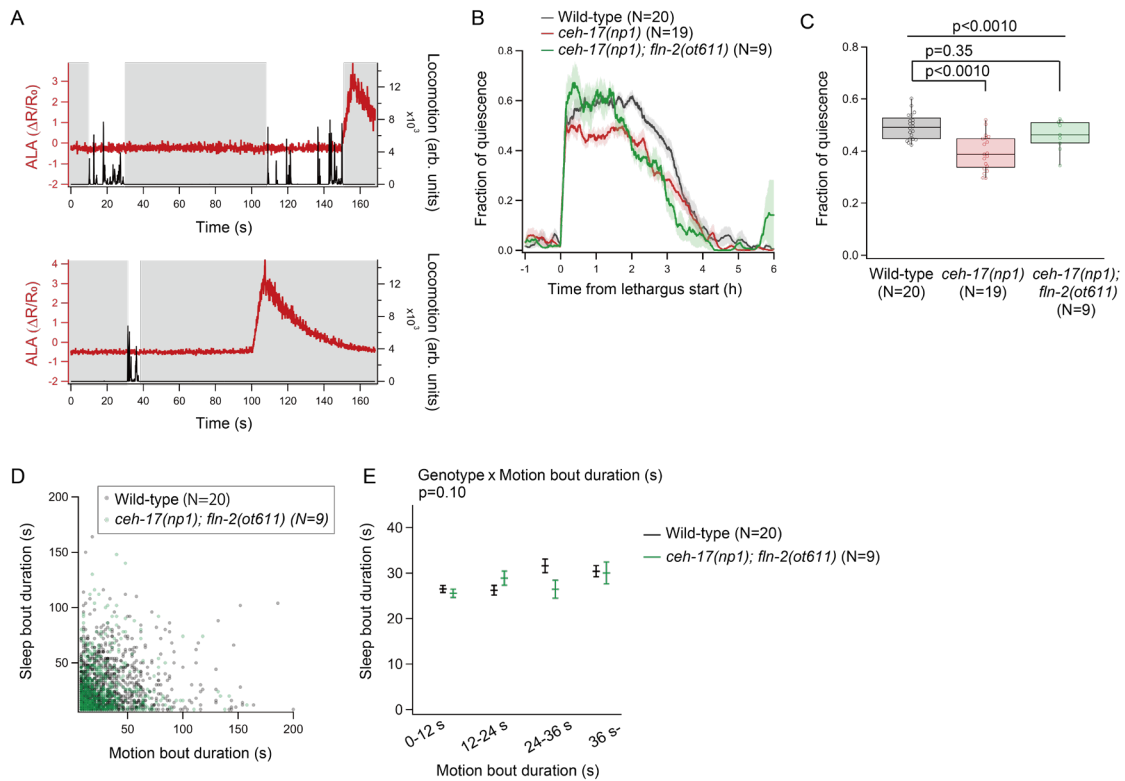

35

36 **Figure S3.** Detailed analyses of strains carrying *ceh-17(np1)* (related to Figure 3)

37 (A) Additional representative patterns of  $Ca^{2+}$  activity (red) and locomotor activity (black) in the *ceh-17(np1)*  
 38 mutant (SLP930 *ceh-17(np1); lite-1(ce314); wtfIs5[Prab-3::NLS::GcaMP6s + Prab-3::NLS::tagRFP]*).

39 Grey areas represent sleep bouts.

40 (B) Averaged patterns of fraction of quiescence around lethargus in wild-type (black), SLP769 *ceh-17(np1)*  
 41 mutant (red), and IB16 *ceh-17(np1); fln-2(ot611)* mutant (green). The same data as in Figure 3C are shown  
 42 for wild-type and SLP769. Shaded areas indicate  $\pm$ SEM.

43 (C) Comparison of the mean fraction of quiescence among wild-type, SLP769 *ceh-17(np1)*, and IB16 *ceh-*  
 44 *17(np1); fln-2(ot611)*. The same data as in Figure 3D are shown for wild-type and SLP769. P-values in the  
 45 Tukey multiple comparison test are indicated.

46 (D) Sleep bout duration plotted against the prior motion bout duration in wild-type (black) and IB16 *ceh-*  
 47 *17(np1); fln-2(ot611)* mutants (green). The same data as in Figure 3I are shown for wild-type.

48 (E) Comparisons of the distribution of sleep bout durations based on the duration of the prior motion bouts in  
 49 wild-type (black) and IB16 *ceh-17(np1); fln-2(ot611)* mutants (green). The same data as in Figure 3J are  
 50 shown for wild-type. P-value in the interaction between genotype and motion bout duration in two-way  
 51 ANOVA is indicated above the graph.

52 N and n in the figure represent numbers of animals and bouts, respectively.

53

SLP983 *remEx394*[*Pver-3::ChR2(C128S)::GFP*]

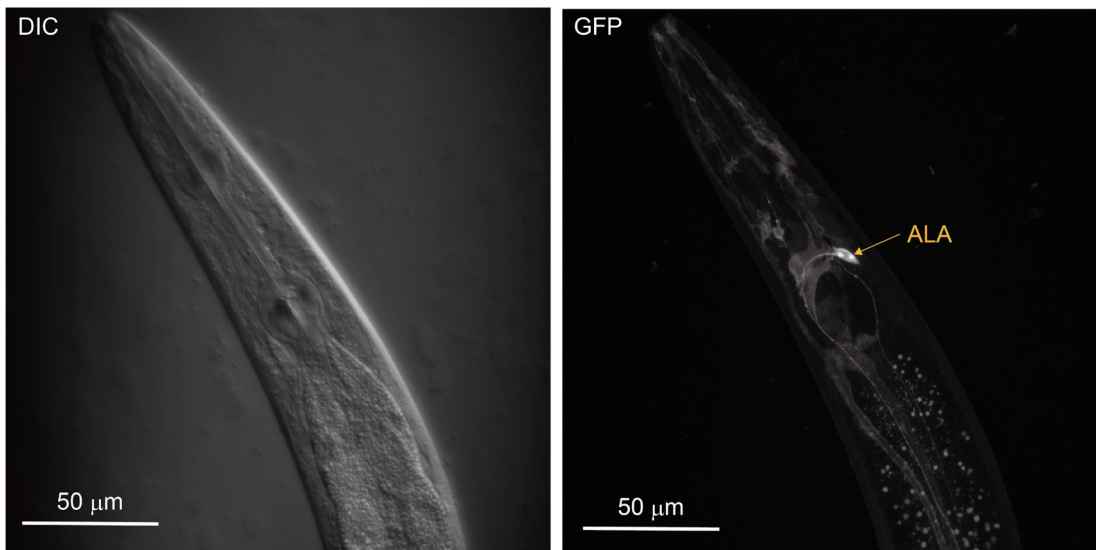

54

55 **Figure S4.** Expression pattern of ChR2(C128S)::GFP in SLP983 *remEx394*[*Pver-3::ChR2(C128S)::GFP*]  
56 (related to Figure 4)

57 Representative confocal image of SLP983 *remEx394*[*Pver-3::ChR2(C128S)::GFP*].

58 DIC image (left) and fluorescent image (right) are shown. Arrow indicates the ALA cell body.

59
